# Supplementary material
Source: publisher figshare collection journal article supplement (https://acs.figshare.com/ndownloader/files/6893207)
Supplement: Supplementary file 1 [file 6893207]

# Hydrophobic Carbon Nanodots with Rapid Cell Penetrability and Tunable Photoluminescence Behavior for in Vitro and in Vivo Imaging

Quan-Xing Mao,<sup>†</sup> Shuang E,<sup>†</sup> Jun-Mei Xia,<sup>†</sup> Ru-Sheng Song<sup>‡</sup>, Yang Shu<sup>‡</sup>, Xu-Wei Chen,<sup>\*,†</sup> Jian-Hua Wang,<sup>\*,†</sup>

<sup>†</sup>Research Center for Analytical Sciences, Department of Chemistry, College of Sciences, Northeastern University, Box 332, Shenyang 110819, China

<sup>‡</sup>Institute of Biotechnology, College of Life and Health Sciences, Northeastern University, Shenyang 110169, China

\*Corresponding authors.

E-mail address: [chenxuwei@mail.neu.edu.cn](mailto:chenxuwei@mail.neu.edu.cn) (X.W. Chen) and [jianhuajrz@mail.neu.edu.cn](mailto:jianhuajrz@mail.neu.edu.cn) (J.H. Wang).

Tel: +86 24 83688944; Fax: +86 24 83676698

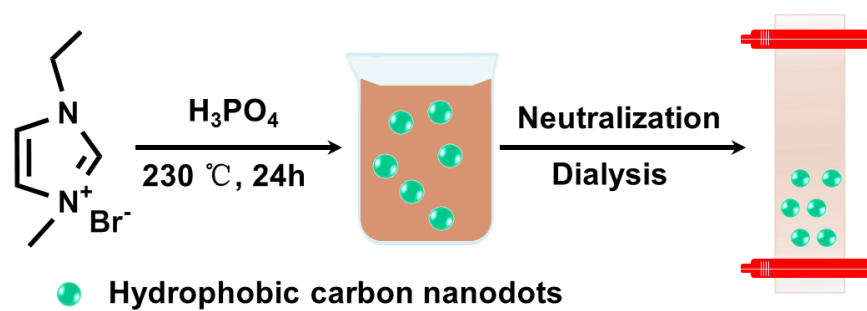

Scheme S1. The preparation process of hydrophobic carbon nanodots.

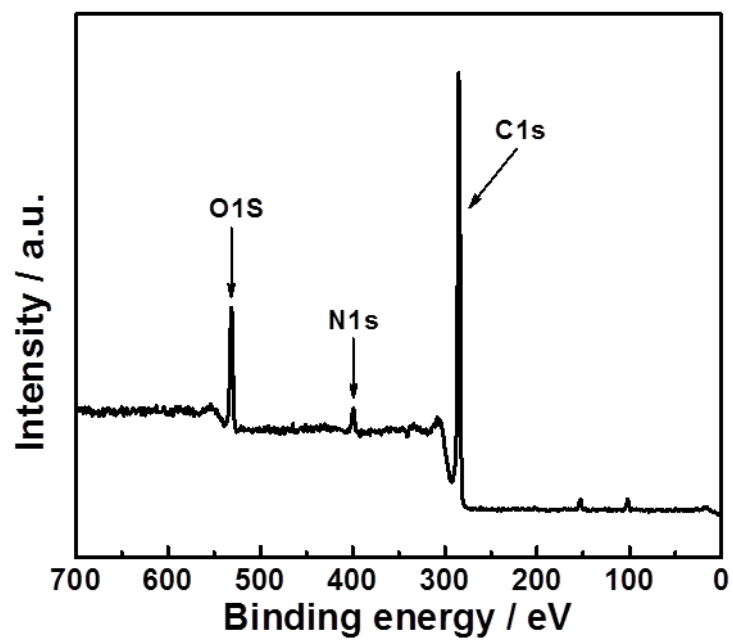

Figure S1. Full scan XPS results of hydrophobic CNDs.

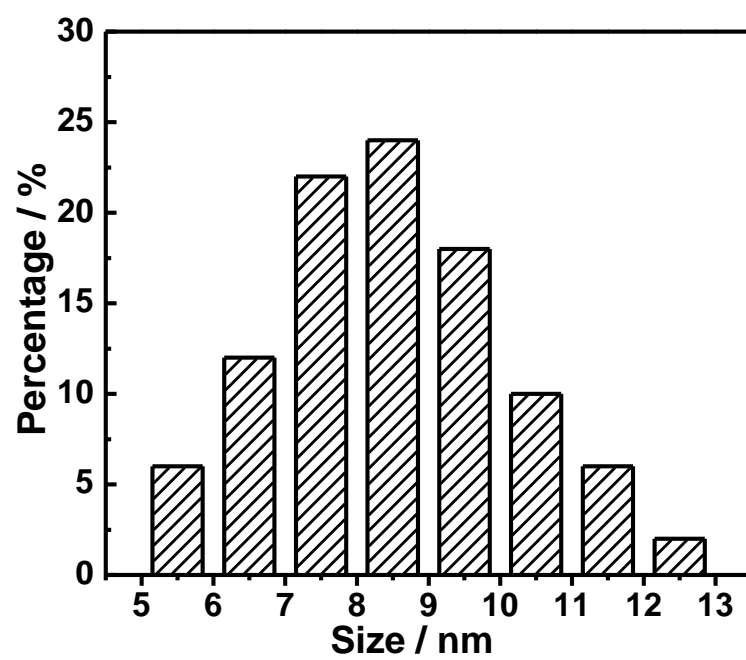

Figure S2. Size distribution histogram of hydrophobic CNDs.

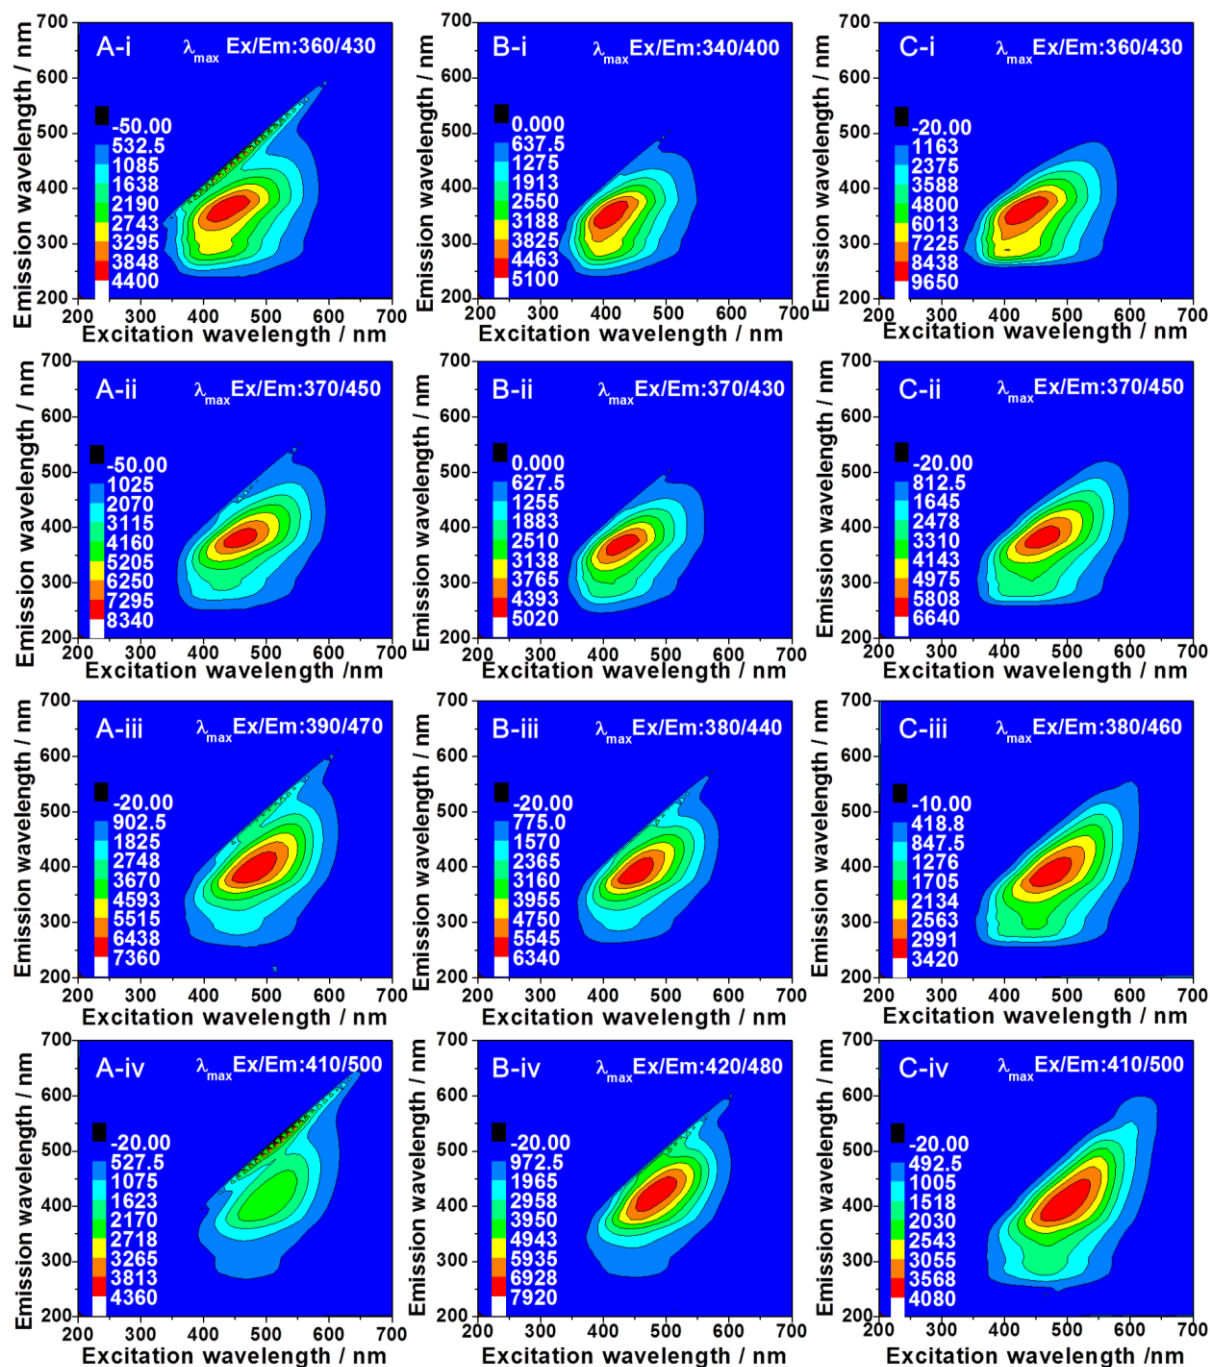

Figure S3. Concentration-dependent photoluminescence property of the hydrophobic CNDs in different organic solvents: (A) acetonitrile, (B) cyclohexane, (C) dimethyl sulfoxide; (i)  $0.2 \text{ mg mL}^{-1}$ , (ii)  $0.5 \text{ mg mL}^{-1}$ , (iii)  $1.0 \text{ mg mL}^{-1}$ , (iv)  $2.0 \text{ mg mL}^{-1}$ .

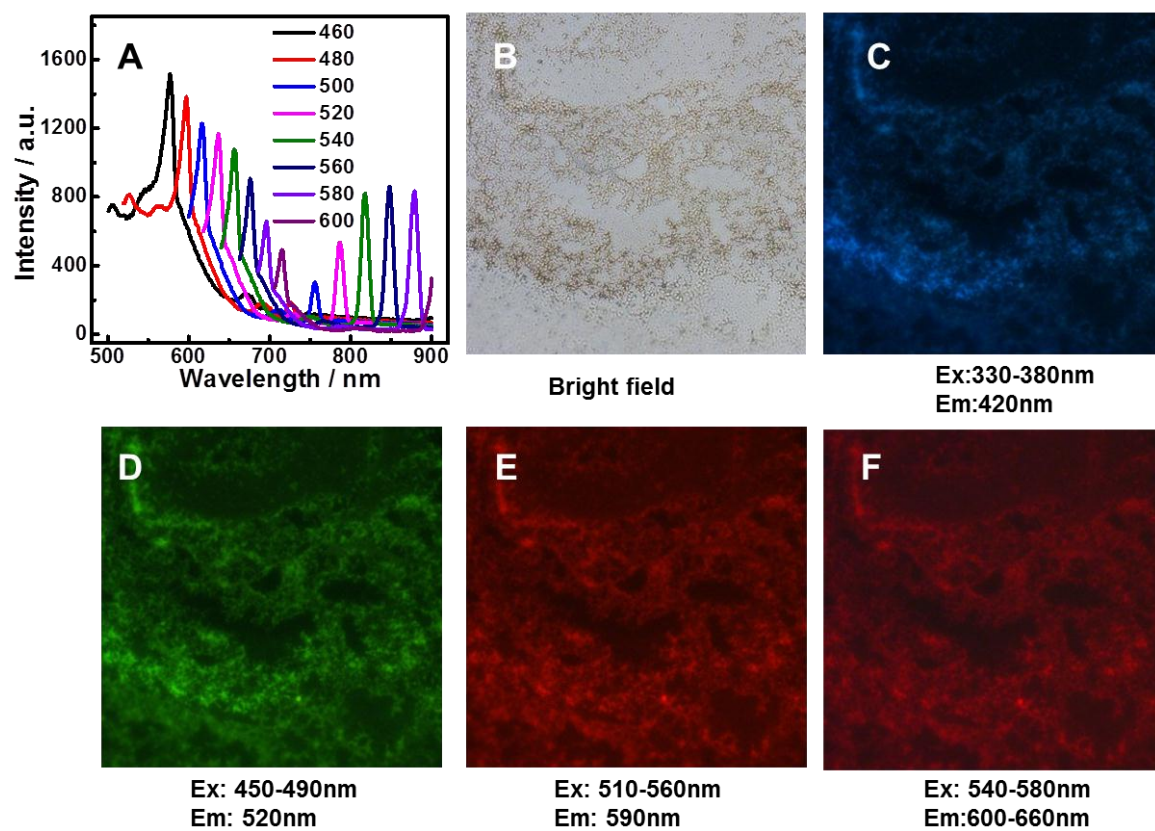

Figure S4. The fluorescence spectra in solid state (A) and fluorescent images of solid hydrophobic carbon nanodots (B-F) irradiated at various excitation/emission wavelengths. The legends in (A) represent different excitation wavelengths.

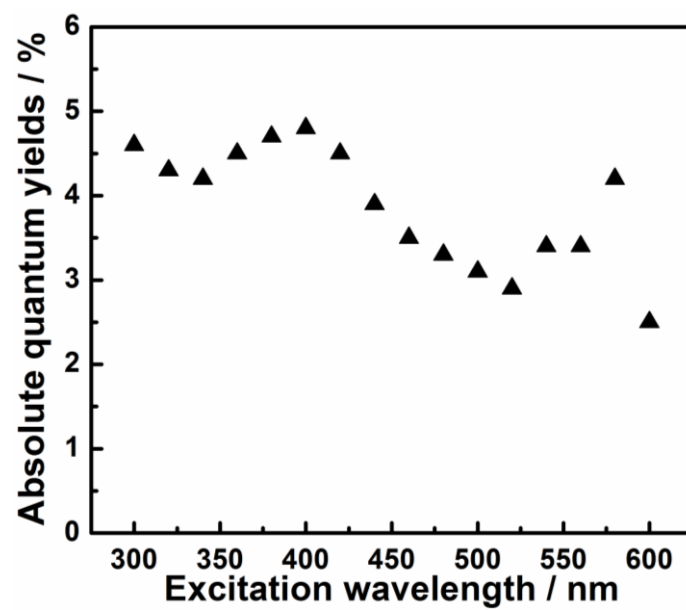

Figure S5. The fluorescence quantum yields of hydrophobic CNDs at various excitation wavelengths in the range of 300-600 nm.

Table S1. Absolute quantum yields of hydrophobic CNDs at various excitation wavelengths.

|                              |     |     |     |     |     |     |     |     |
|------------------------------|-----|-----|-----|-----|-----|-----|-----|-----|
| Excitation wavelength<br>/nm | 300 | 320 | 340 | 360 | 380 | 400 | 420 | 440 |
| Absolute quantum<br>yields   | 4.6 | 4.3 | 4.2 | 4.5 | 4.7 | 4.8 | 4.5 | 3.9 |
| Excitation wavelength<br>/nm | 460 | 480 | 500 | 520 | 540 | 560 | 580 | 600 |
| Absolute quantum<br>yields   | 3.5 | 3.3 | 3.1 | 2.9 | 3.4 | 3.4 | 4.2 | 2.5 |



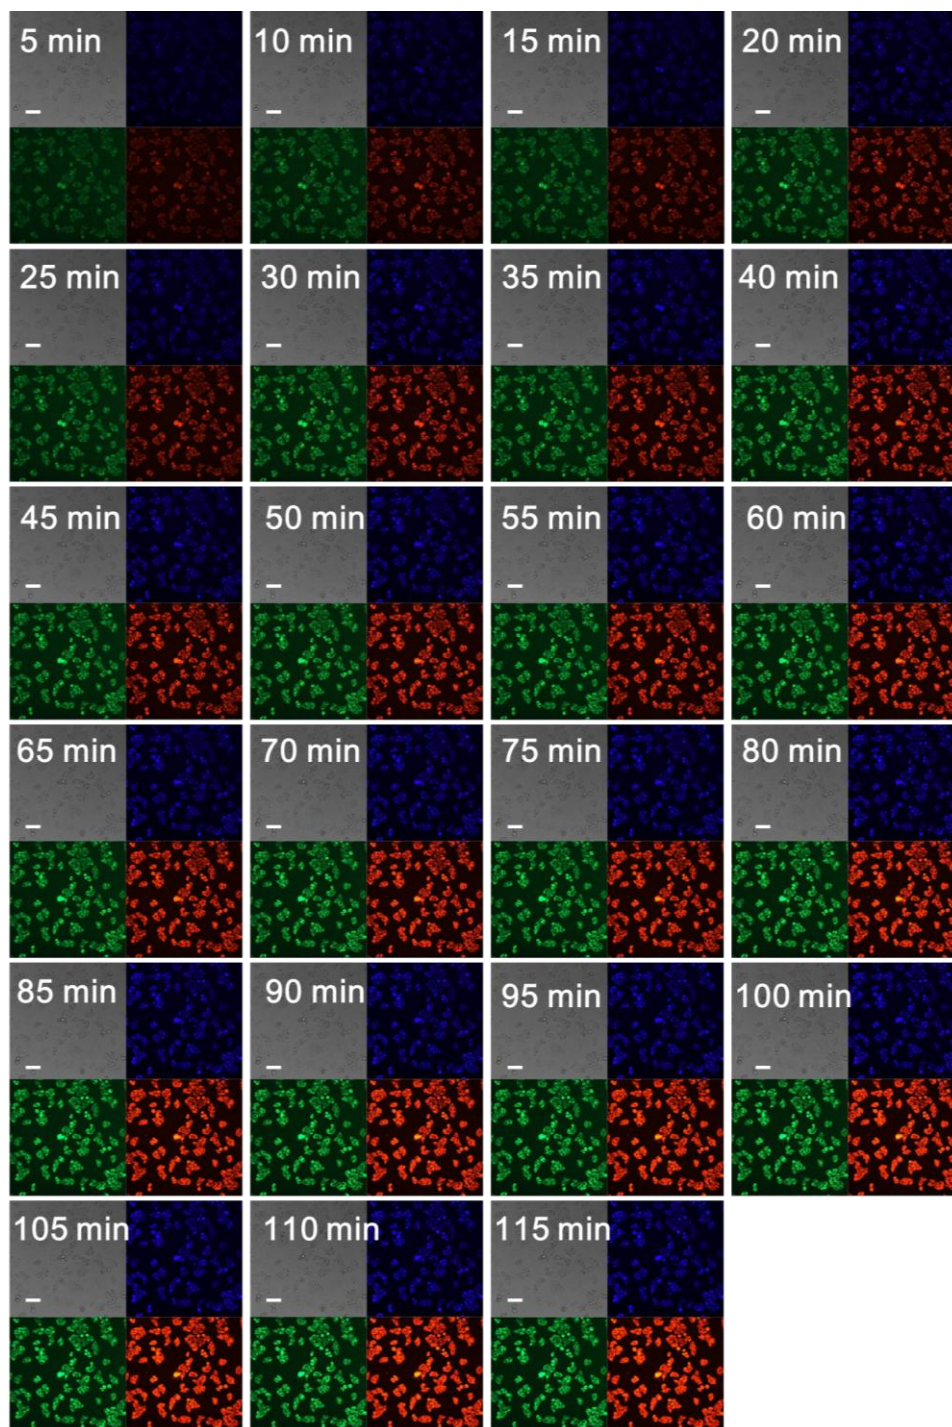

Figure S6. The fluorescent images of HeLa cells recorded every 5 minutes after adding hydrophobic CNDs into culture medium. Every picture is taken at bright field (top left), with excitation/emission at 405/415-475 nm (top right), 488/500-550 nm (bottom left), 561/580-650 nm (bottom right). The scale bars represent 100  $\mu$ m

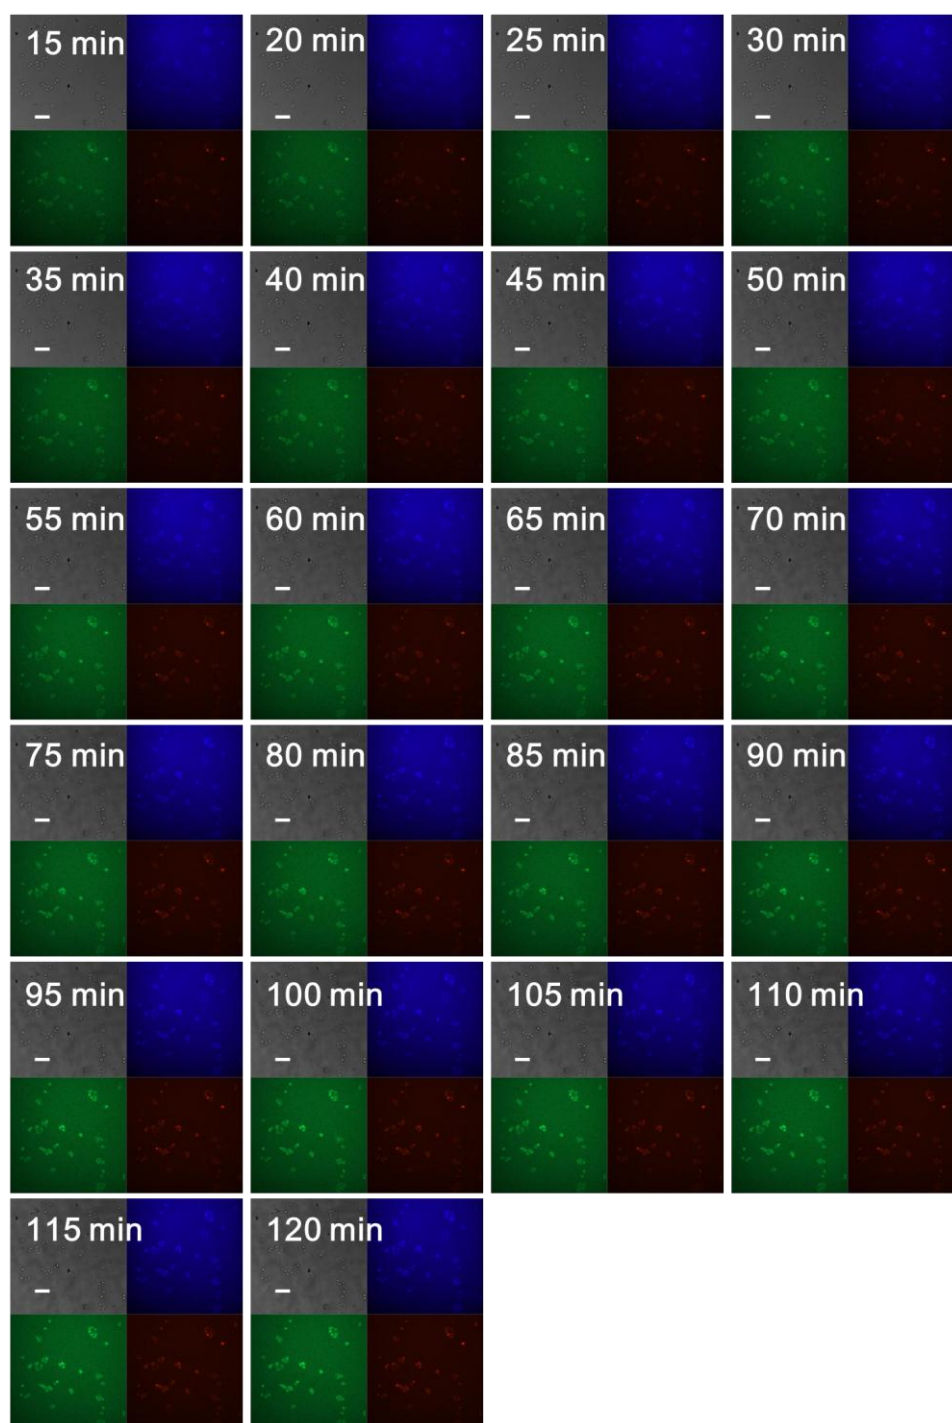

Figure S7. The fluorescent images of HeLa cells recorded every 5minutes after adding hydrophilic CNDs into culture medium. Every picture is taken at bright field (top left), with excitation/emission at 405/415-475 nm (top right), 488/500-550 nm (bottom left), 561/580-650 nm (bottom right). The scale bars represent 100 μm.

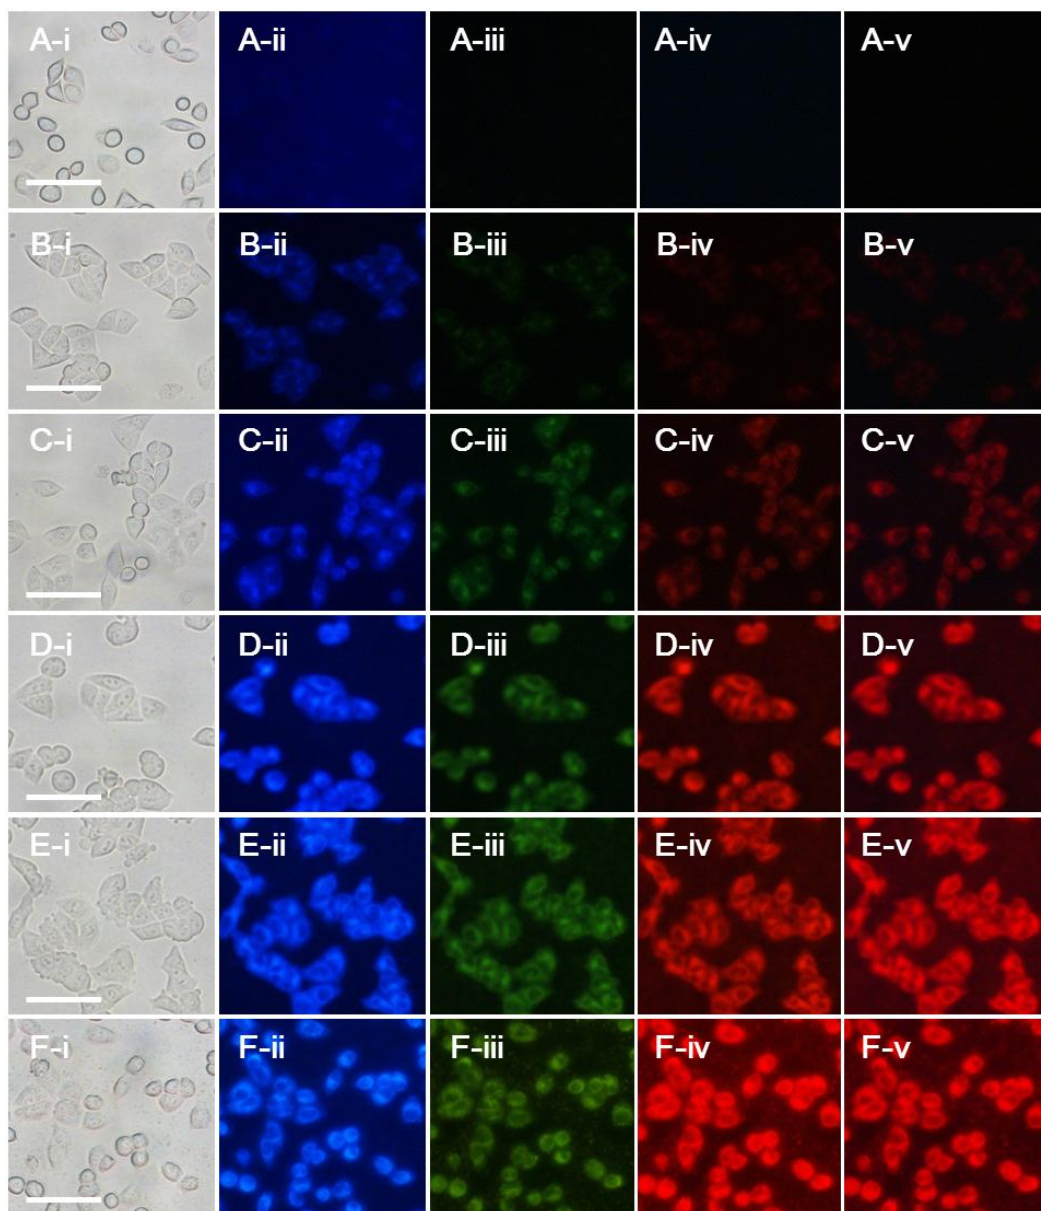

Figure S8. The fluorescence images of HeLa cells incubated with hydrophobic carbon nanodots for 3h at various concentration levels. (A)  $0 \mu\text{g mL}^{-1}$ , (B)  $1.5 \mu\text{g mL}^{-1}$ , (C)  $5.0 \mu\text{g mL}^{-1}$ , (D)  $10.0 \mu\text{g mL}^{-1}$ , (E)  $20.0 \mu\text{g mL}^{-1}$ , (F)  $50.0 \mu\text{g mL}^{-1}$ . The images are recorded at the following excitation/emission wavelengths: (i) bright field, (ii) 330-380/420 nm, (iii) 450-490/520 nm, (iv) 510-560/590 nm, (v) 540-580/600-660 nm. The scale bars represent 100  $\mu\text{m}$ .



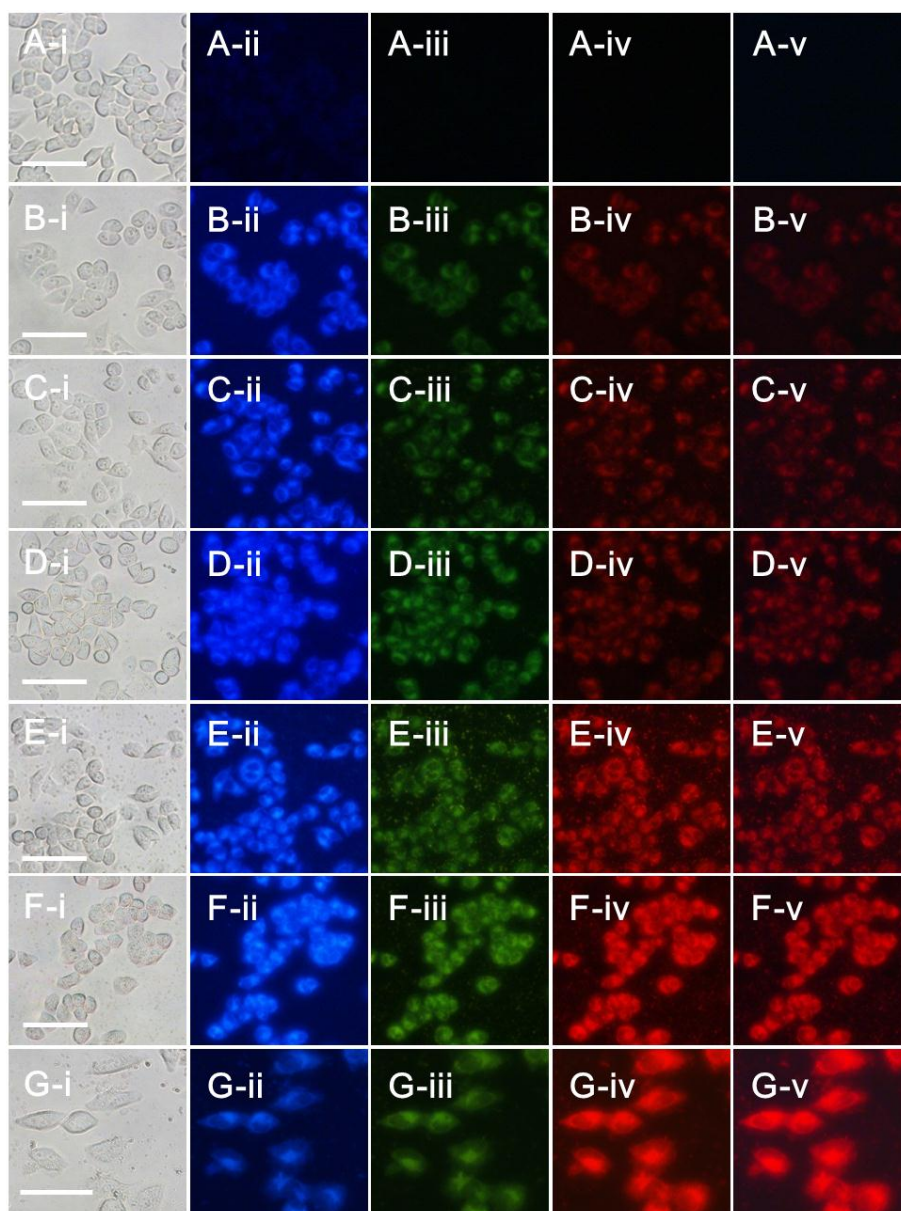

Figure S9. The fluorescence images of HeLa cells incubated with hydrophobic carbon nanodots for different times at (A) 0 h, (B) 0.5 h, (C) 1h, (D) 2 h, (E) 3 h, (F) 5 h, (G) 10 h. The images are recorded at the following excitation/emission wavelengths: (i) bright field, (ii) 330-380/420 nm, (iii) 450-490/520 nm, (iv) 510-560/590 nm, (v) 540-580/600-660 nm. The scale bars represent 100  $\mu$ m.

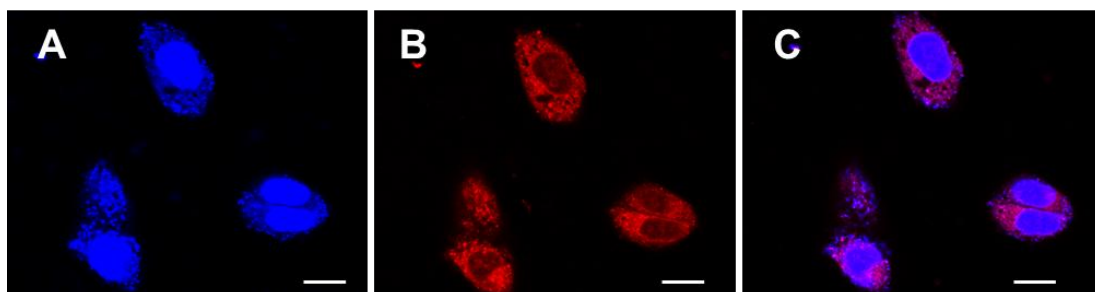

Figure S10. The fluorescence images of HeLa cells incubated with hydrophobic CNDs and stained with DAPI. (A) Excitation/emission at 405/420-480 nm; (B) Excitation/emission at 635/655-755 nm; (C) the merge of A and B. The scale bars represent 20  $\mu\text{m}$ .

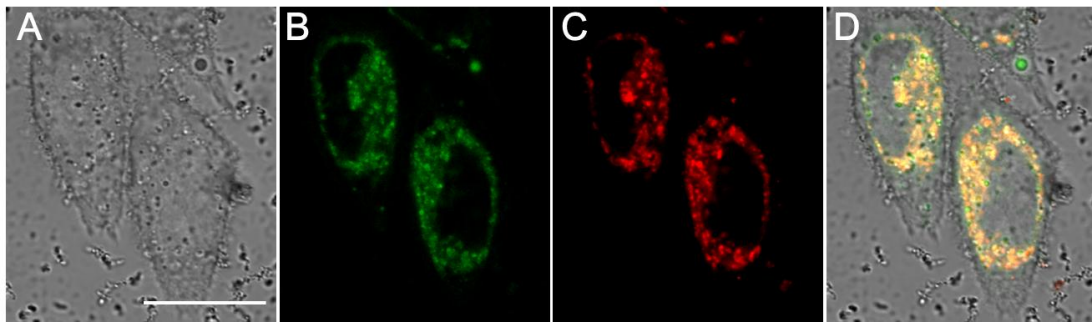

Figure S11. Images of HeLa cells incubated with hydrophobic CNDs and stained with lyso-tracker red, by taking a bright field (A), with excitation/emission wavelength of (B) 488/520-560nm, (C) 561/585-600 nm, (D) the merge of (B) and (C). The scale bar in A represents 20  $\mu\text{m}$ .
